# Supplementary material
Source: PubMed Central journal article supplement (PMC6550009)
Supplement: joces-132-226886-s1.pdf [file joces-132-226886-s1.pdf]

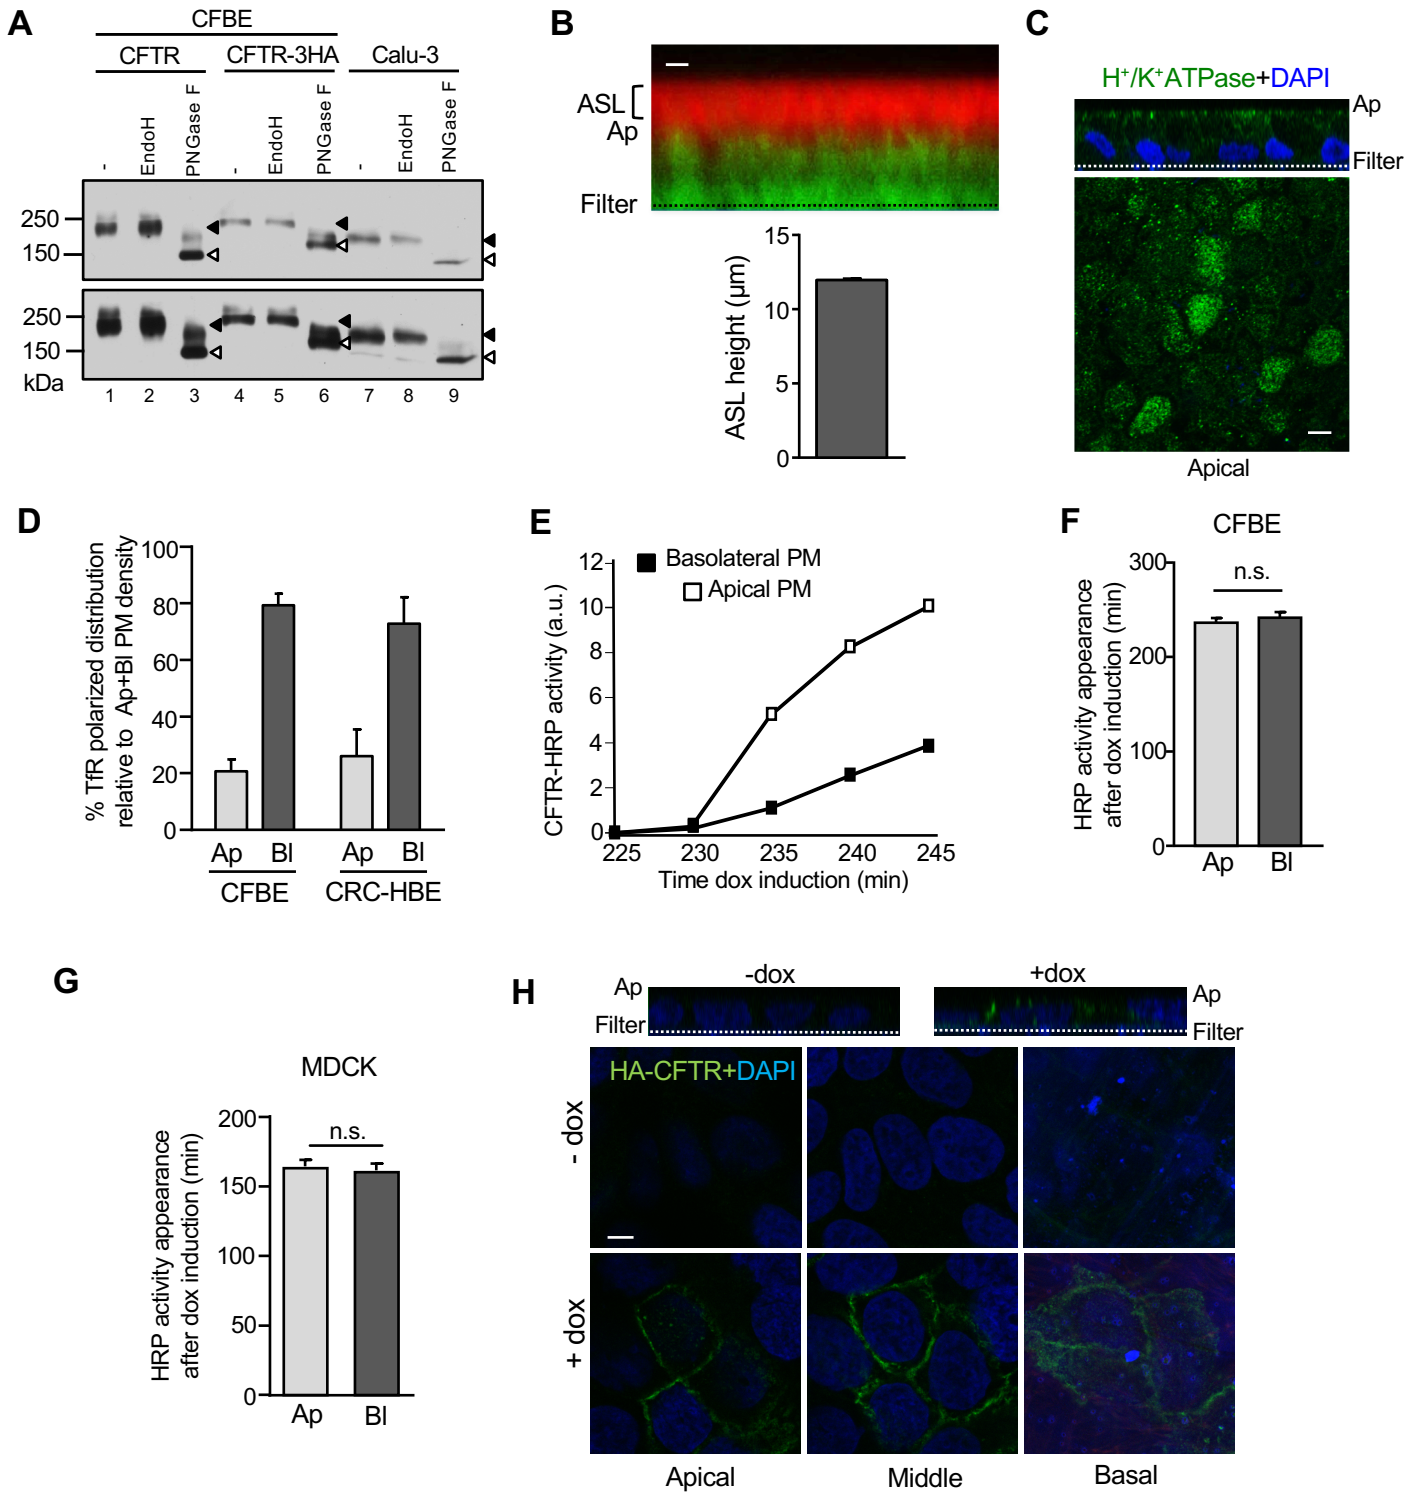

**Figure S1. Biochemical and morphological characterization of immortalized (CFBE) and primary conditionally reprogrammed (CR-HBE) human bronchial epithelia.**

(A) Electrophoretic mobility shifts of endogenous and exogenous CFTR after endoglycosidase digestion, visualized by immunoblotting. Cell lysates from Calu-3 cells or CFTR and CFTR-3HA expressing polarized CFBE cells were probed with anti-CFTR (L12B4 and M3A7) Abs before or after endoglycosidase H (EndoH) or Peptide-N-Glycosidase F (PNGase F) digestion. Complex-glycosylated and deglycosylated forms of CFTR are indicated by filled and empty arrowheads, respectively.

(B) ALI differentiated CR-HBE and the airway surface liquid (ASL) were stained with Cell tracker (green) and rhodamin-dextran (red), respectively (upper panel). ASL height was determined in 3-10 areas on 2 filters in 2 independent experiments as described in Methods. Bar: 10 $\mu$ m.

(C) Differentiated CR-HBE cells at ALI interface were immunostained for H<sup>+</sup>/K<sup>+</sup>-ATPase (green) and the nuclei were visualized with DAPI (blue). Bar: 5 $\mu$ m.

(D) Steady-state PM expression of TfR in filter-grown CFBE and CR-HBE was measured after HRP-Tf loading for 1-3 h at 37 $^{\circ}$  C from the apical or basolateral compartment. HRP activity was measured at both apical and basolateral PM. Surface density is expressed as the % of total PM expression (n=7/CFBE or 4/CR-HBE).

(E-G) Newly synthesized CFTR-HRP concurrently arrives at both PM domains. CFTR-HRP activity was monitored after dox-induction at indicated times in the apical and basolateral compartments. Representative experiment in CFBE is shown in (E) and the mean delay of CFTR-HRP arrival time after dox induction is depicted in CFBE (n=8) and MDCK cells in (G) (n=5).

(H) Specificity of basolateral CFTR staining on filter grown CFBE cells. CFBE were induced (+dox) or not (-dox) in the presence of doxycycline and incubated with anti-HA Ab from the basolateral compartment for 45 min at 37 $^{\circ}$  C, while the apical compartment was supplemented with goat anti-mouse Fab. Indirect immunostaining was done on permeabilized cells and labeled CFTR was visualized by LCFM. Upper panels are representative z-sections. CFTR (green), actin (red) and DAPI (blue). Scale bar, 5 $\mu$ m. Data are means  $\pm$  SEM on each panel. n.s. non-significant.

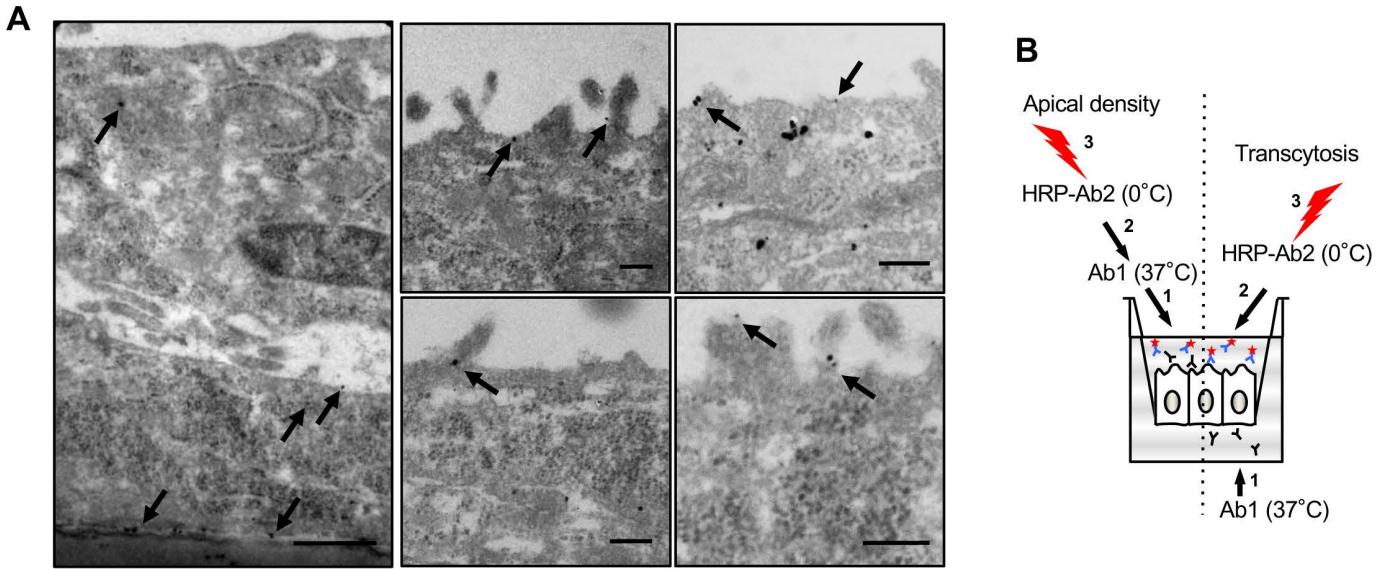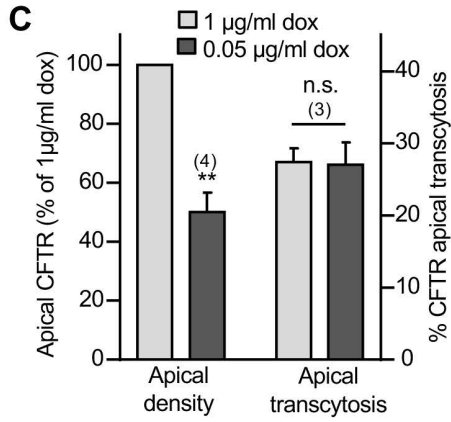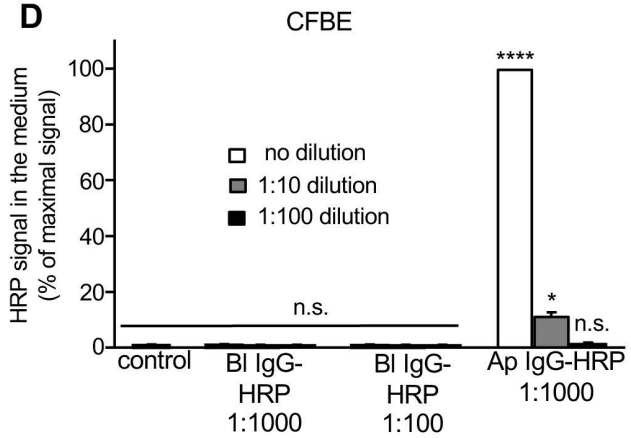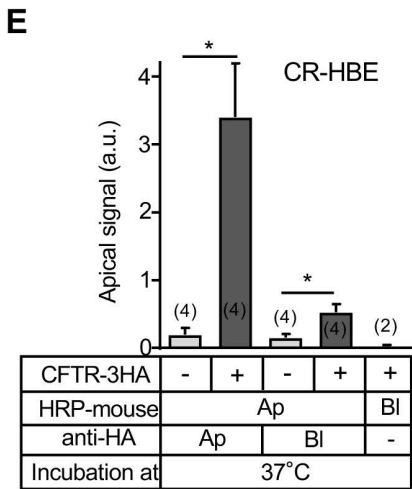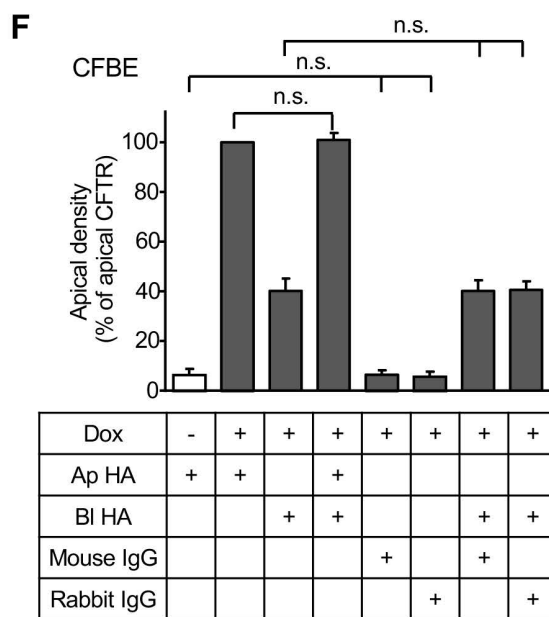

**Figure S2. Assay development to monitor CFTR transcytosis in polarized human airway cells.**

(A) Immuno-EM detection of CFTR-3HA after basolateral anti-HA labeling (3h, 37°C) in CFBE. CFTR-3HA-anti-HA complexes were revealed with nanogold-conjugated anti-mouse Ab (arrows). Scale bar, 0.2 µm.

(B) Apical transcytosis assay. Basolateral PM proteins were labeled with primary Ab (Ab1) at 37°C (1, right) and the Ab apical appearance was quantified by HRP-conjugated secondary Ab binding (Ab2) in the presence of Amplex Red substrate (2-3, right). In parallel samples, the steady-state CFTR density was determined at the apical PM by PM-ELISA at 37°C (1-3, left).

(C) Relative transcytosis flux of CFTR is unaltered after 50% reduction of the apical CFTR expression. CFTR expression was induced in the presence of 0.05 µg/ml (light gray) or 1 µg/ml (dark grey) doxycycline. At 0.05 µg/ml doxycycline CFTR-3HA expression was ~25% of that detected in Calu-3 cells by quantitative immunoblotting (see also Fig.1A). Apical density and relative transcytosis of CFTR were measured by PM-ELISA.

(D-F) Specificity of the PM-ELISA-based CFTR transcytosis assay in CFBE (D, F) and in CR-HBE (E) cells. (D) HRP-conjugated anti-mouse IgG were incubated in the apical (Ap) or basolateral (Bl) compartment of CFBE cells and HRP activity of diluted apical medium samples was measured in the presence of Amplex Red. Signal was normalized to the maximum HRP activity, obtained with apical IgG-HRP and statistical difference was calculated relative to untreated cells (n=3). HRP-anti-mouse Ab did not traverse the CFBE monolayer to the apical compartment. (E) No significant signal was detected at the apical PM after basolateral (3h, 37° C) incubation of HRP-anti-mouse Ab in CR-HBE. (F) Similar HRP-anti-mouse IgG activity was measured at the Ap PM after Ap or Ap+Bl anti-HA incubation. No significant HRP signal was detectable at the apical PM after basolateral mouse or rabbit IgG alone or in the absence of CFTR expression with anti-HA incubation (n=3).

Data are means ± SEM on each panel, parentheses indicate the number of independent experiments. n.s. non-significant, \* p<0.05, \*\* p<0.01, \*\*\*\* p<0.0001.

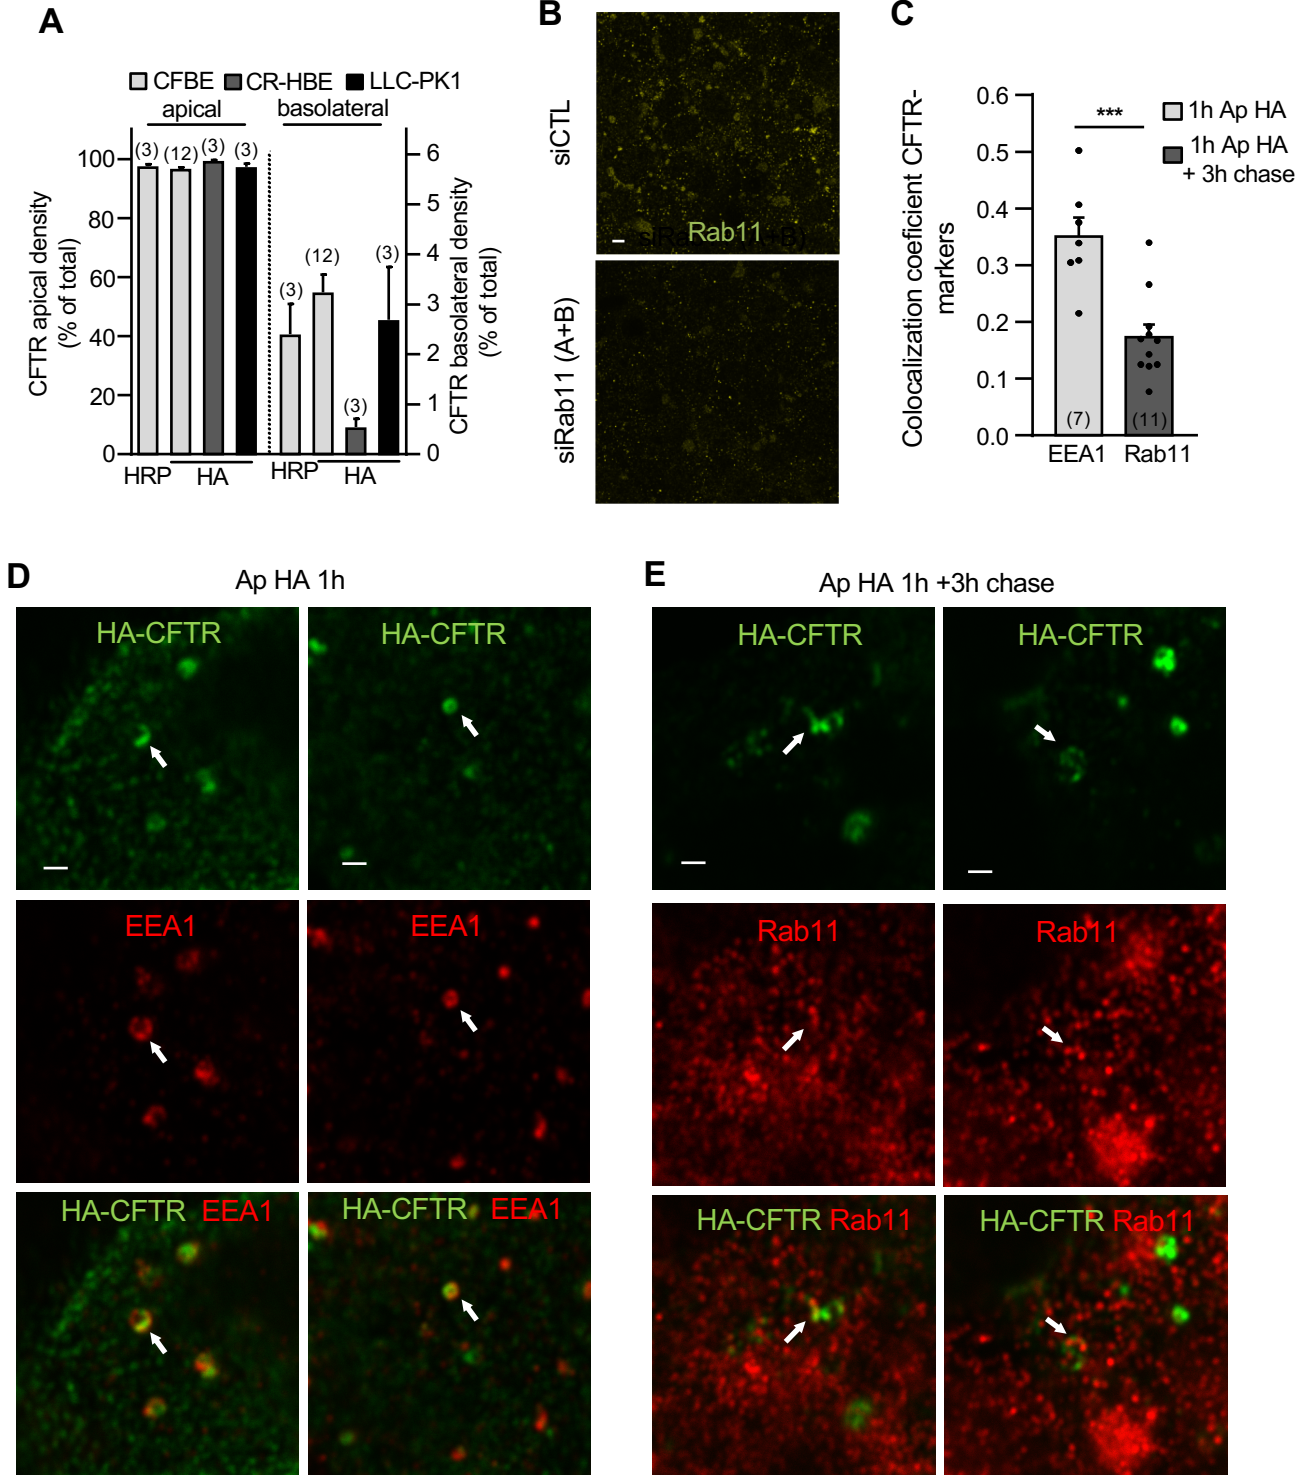

**Figure S3. CFTR polarity and trafficking in CFBE cells.**

(A) The steady-state apical and basolateral PM density of CFTR-3HA and CFTR-HRP was revealed by PM-ELISA and Amplex Red alone, respectively in CFBE, CR-HBE and LLC-PK1 cells. CFTR domain-specific expression is indicated as percentage of its total PM density.

(B) Specificity of Rab11 immunostaining was confirmed after its ablation with Rab11A+B siRNAs with indirect immunostaining. Scale bar: 5  $\mu$ m.

(C-E) Apical trafficking of CFTR. CFTR was labelled with anti-HA Abs from the apical compartment (1h, 37°C) in absence or presence of 3h chase at 37°C to accumulate the channel in EEA1+ ASE or Rab11+ ARE, respectively. (C) shows the Mander's colocalization coefficient of apically endocytosed CFTR with organellar markers on whole 3D-volumes (unpaired t-test, \*\*\* $p < 0.001$ ) and (D-E) show representative images.

Data are means  $\pm$  SEM on each panel, parentheses indicate the number of independent experiments (A) or z-stacks (C), \*\*\* $p < 0.001$ .

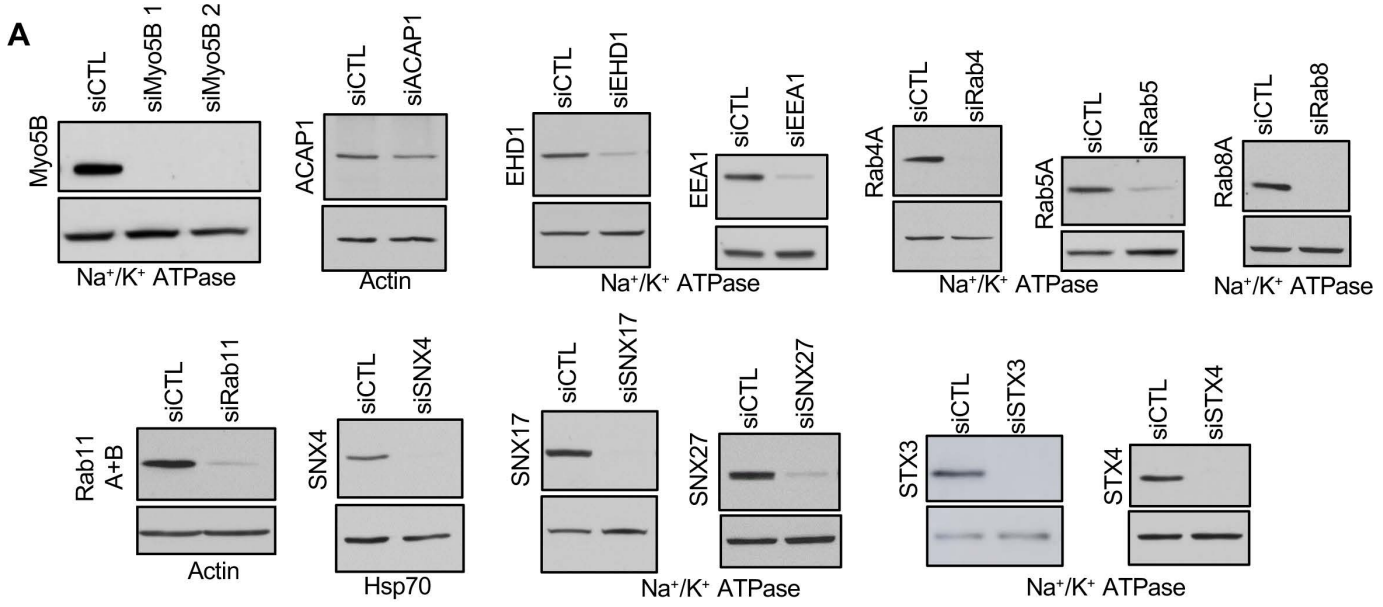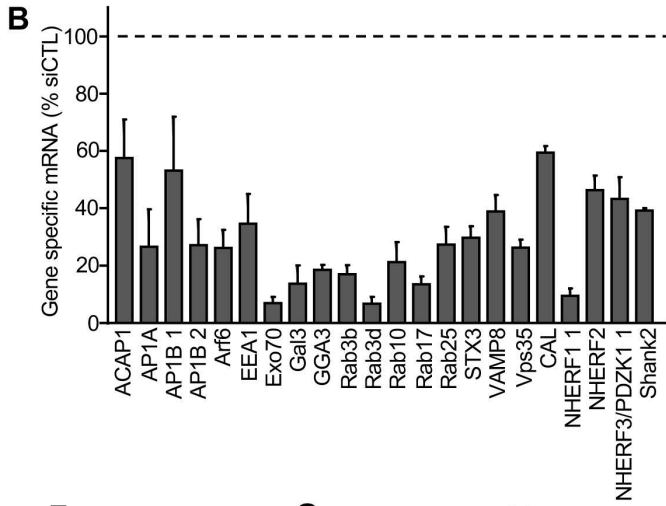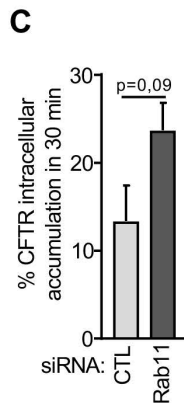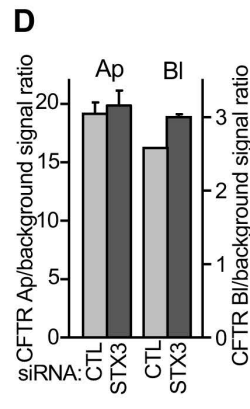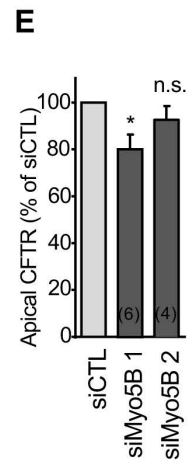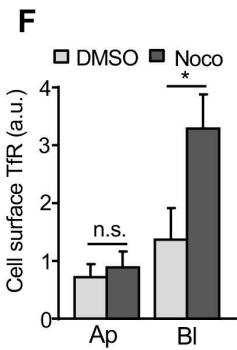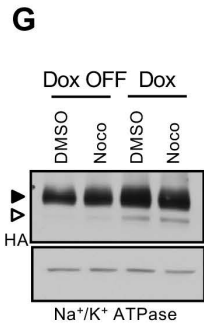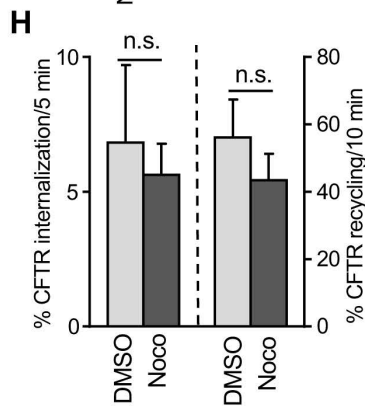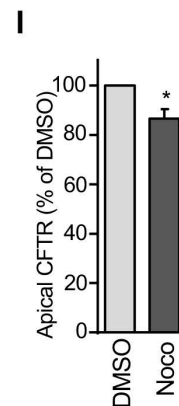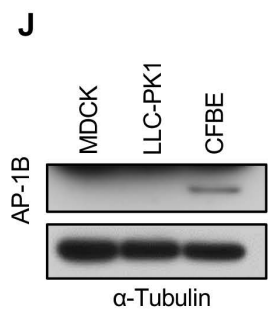

**Figure S4. Candidate modulators of CFTR transcytosis.**

(A-B) Validation of siRNA mediated silencing of target genes by immunoblotting (A) or qPCR (B) as described in Methods. Na<sup>+</sup>/K<sup>+</sup> ATPase,  $\beta$ -actin and Hsp70 were used as loading controls for the immunoblots. The bar plot includes the means  $\pm$  SEM of parallel samples from 3-6 independent experiments and expressed as percentage of mRNA expression of siCTL transfected CFBE cells.

(C) Rab11 siRNA leads to an intracellular accumulation of CFTR. Apical CFTR was labelled with anti-HA Ab for 1h on ice and chased (30 min, 37°C) in siRab11 or CTL siRNA transfected CFBE cells (n=5).

(D) STX3 silencing does not compromise the polarity of CFTR. CFTR steady-state PM density was measured by PM-ELISA after 3h anti-HA apical or basolateral labelling at 37°C. Histogram shows the PM signal/PM background (IgG instead of anti-HA Abs) ratio (n=1, 2 technical replicates).

(E) One of the Myo5B siRNA modestly reduces CFTR apical density as compared to that of non-targeted CTL siRNA.

(F) The apical and basolateral PM density of TfR was assayed by PM-ELISA after DMSO (1:1000) or nocodazole (Noco, 33  $\mu$ M) treatment (3,5h). Ap: apical; Bl: basolateral (n=4).

(G) Inhibition of transcription/translation of CFTR in dox-OFF CFBE cells decreases the core- and complex-glycosylated CFTR, detected by immunoblotting. Nocodazole (33  $\mu$ M for 3.5 h) has no effect on CFTR expression relative to DMSO. Equal amounts of cell lysates were loaded. Na<sup>+</sup>/K<sup>+</sup>-ATPase was the loading control.

(H) MT disruption by nocodazole (Noco, 33 $\mu$ M) does not significantly affect CFTR endocytosis and recycling (n=4). Internalization and recycling were measured by PM-ELISA as described in Methods.

(I) The apical PM density of CFTR was assayed by PM-ELISA after DMSO (1:1000) or nocodazole (Noco, 33  $\mu$ M) treatment (3,5h) (n=4).

(J) Detection of AP-1B expression by immunoblotting in the indicated cell lines. 30  $\mu$ g cell lysates were loaded and AP-1B expression was probed. Tubulin was used as loading control.

Data are means  $\pm$  SEM on each panel, parentheses indicate the number of independent experiments. n.s. non-significant, \* p<0.05.



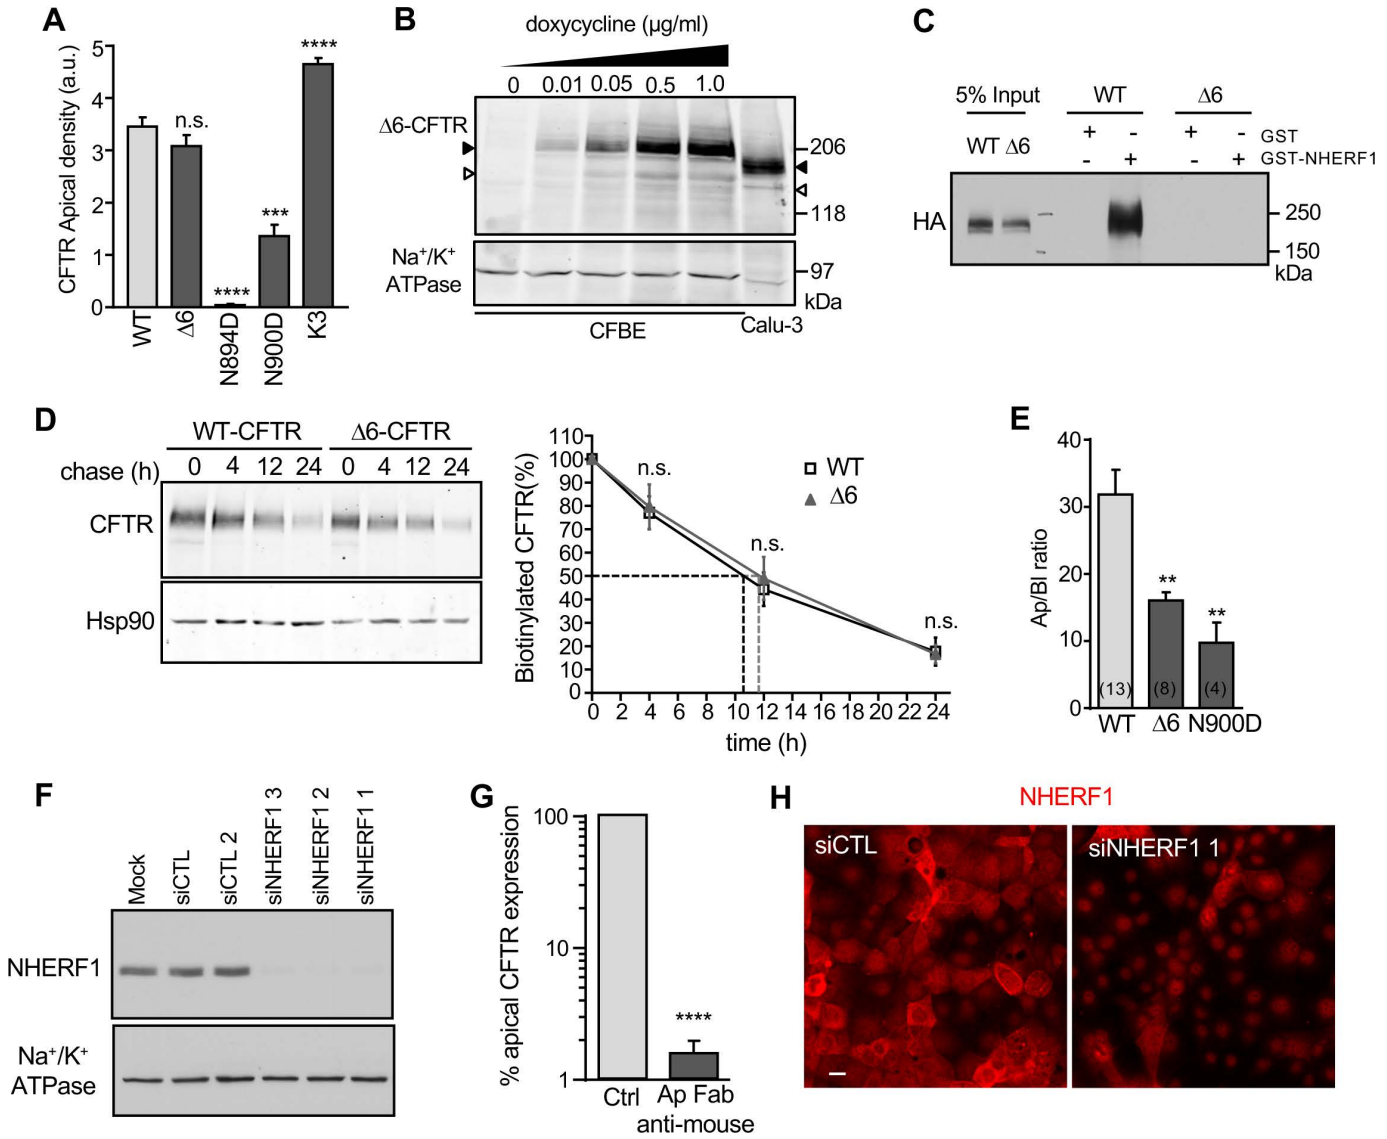

**Figure S5. Cellular and biochemical characterization of  $\Delta 6$ -CFTR and other CFTR variants harboring mutant sorting signals.**

(A) The effect of putative apical or basolateral sorting signals on CFTR PM expression at the apical domain, measured by PM-ELISA. The abbreviations of the mutations are depicted in Fig. 6A (two-tailed unpaired t-test).

(B)  $\Delta 6$ -CFTR was induced with doxycycline at the indicate concentration for 3 days. CFTR-3HA expression was compared to that of endogenous CFTR of Calu-3 cells in equal amounts of cell lysates by immunoblotting with anti-CFTR Abs. Na<sup>+</sup>/K<sup>+</sup>-ATPase was used as loading control.

(C) WT but not  $\Delta 6$ -CFTR binds to recombinant NHERF1. Solubilized WT and  $\Delta 6$ -CFTR were pulled down with recombinant GST- or GST-NHERF1, immobilized on glutathione Sepharose beads. CFTR was probed by immunoblotting together with 5% input of cell lysates with anti-HA Ab and ECL. Representative of 3 independent experiments.

(D) Cell surface stability of WT- and  $\Delta 6$ -CFTR. The PM turnover of CFTR variants was measured by biotinylation with NHS-SS-biotin at 0°C, followed by the indicated chase at 37°C. Biotinylated proteins were immunoprecipitated on monomeric avidin beads and CFTR was visualized by quantitative immunoblotting. Hsp90 was used as loading control. Right panel: quantification of CFTR remaining during the chase (n=3).

(E) WT-,  $\Delta 6$ -, and N900D-CFTR expression ratios at the Ap and Bl (Ap/Bl) PM were measured by comparing the signal obtained at both domains by PM ELISA (parentheses indicate the number of independent experiments, two-tailed unpaired t-test).

(F) NHERF1 siRNA silencing efficiency was monitored by immunoblotting. Na<sup>+</sup>/K<sup>+</sup> ATPase was used as loading control.

(G) The blocking efficiency of anti-HA Ab by goat anti-mouse Fab. After anti-HA labeling of CFTR at the apical PM, CFBE cells were incubated on ice with PBSCM (control) or PBSCM-BSA0.5% + goat anti-mouse Fab (1:75). Remaining anti-HA Ab was probed with HRP-conjugated anti-mouse Ab on ice and the specific HRP activity was quantified in the presence of Amplex Red (n=8).

(H) Specificity of NHERF1 detection was confirmed by immunostaining NHERF1 in control (CTL) or NHERF1 1 siRNA transfected CFBE cells. Scale bar: 20 $\mu$ m.

Data are means  $\pm$  SEM on each panel. n.s. non-significant, \*\* p<0.01, \*\*\* p<0.001, \*\*\*\* p<0.0001.

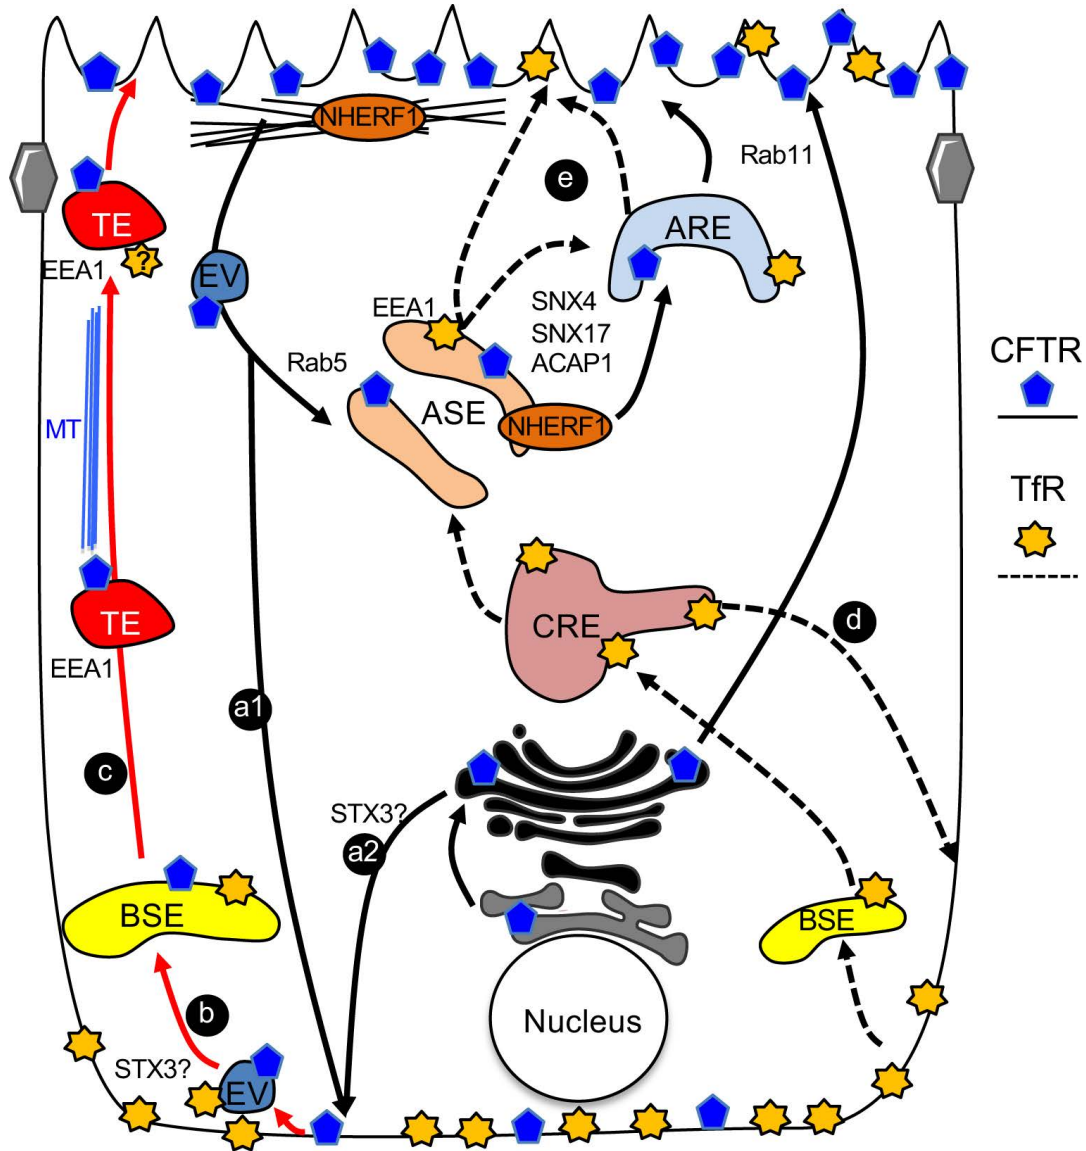

**Figure S6. Working model of CFTR transcytosis in airway epithelia.**

CFTR basolateral missorting occurs from apical endosomes (a1) and at the TGN along the biosynthetic pathway (a2). (b) Missorted basolateral CFTR is retrieved from the basolateral PM into basolateral sorting endosomes (BSE). (c) CFTR is packaged into EEA1 positive transcytotic endosomes (TE) from BSE and ferried to the apical pole in a microtubules-dependent pathway. (d) The basolateral internalization, recycling and (e) transcytotic route of TfR is indicated by dashed lines for comparison (Perez Bay et al., 2013). While in AP1B-KD MDCK cells transcytotic TfR traverses the ARE, in CFBE cells the ARE may have a minor role in TfR delivery to the apical PM. ASE, Apical Sorting Endosome; ARE, Apical Recycling Endosome; BSE: Basolateral Sorting Endosome; CRE: Common Recycling Endosome; EV, Endocytic Vesicles; Bundled blue lines, microtubules (MT); interlaced black lines: cortical F-actin.

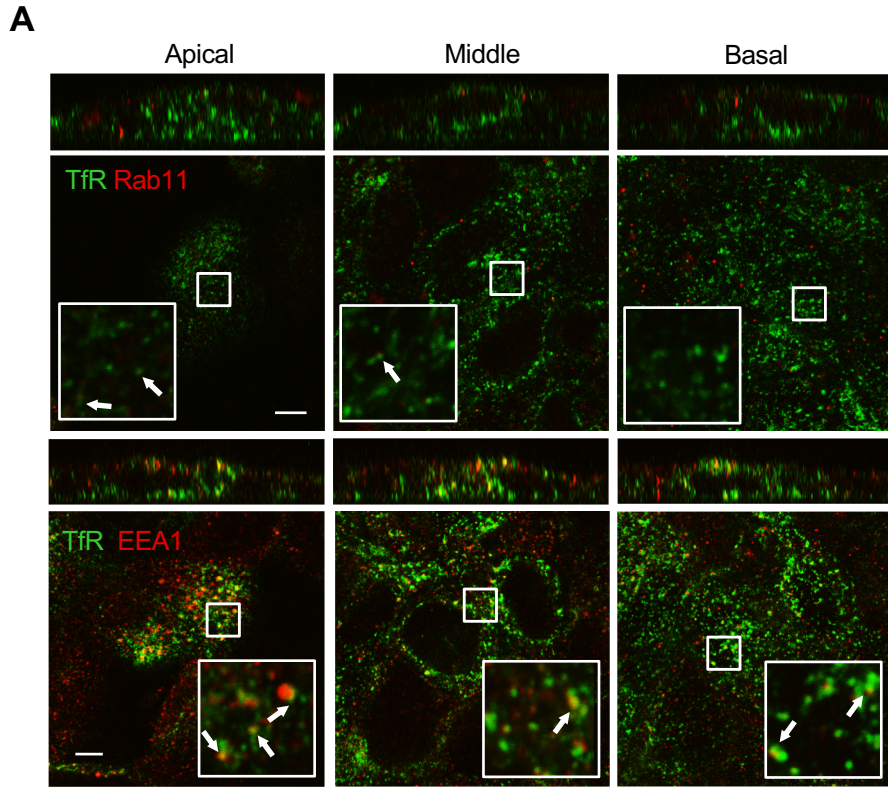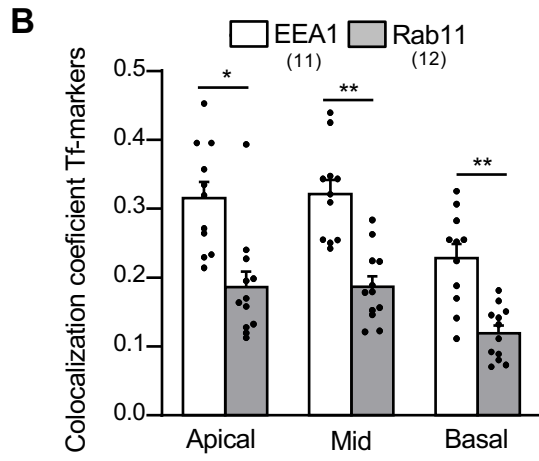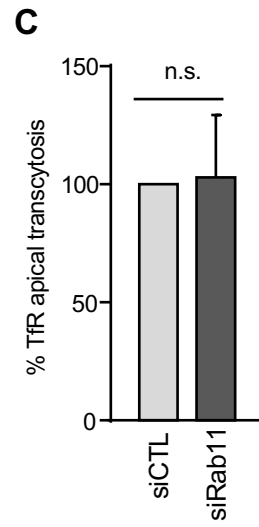

**Figure S7. Characterization of TfR transcytotic pathway in CFBE.**

(A-B) Transcytotic TfR colocalization with CFTR, EEA1 and Rab11. (A) After endogenous Tf depletion (1h, serum-free medium), Tf-Cy3 was loaded for 45min-1h at 37°C in serum-free medium (green), then cells were fixed and co-stained for EEA1 or Rab11 (red). Inserts are selected areas at ~3.5-fold increased magnification. (B) Quantitative colocalization of transcytotic TfR with EEA1 and Rab11 was measured by the Mander's coefficient on each slice of 3D-volumes (parentheses indicate the number of z-stacks from 2 independent experiments) that were sorted in 3 sections (apical, middle and basal), two-tailed unpaired t-test. (C) TfR apical transcytosis was measured after 3h of Tf-HRP uptake from the basolateral compartment in CFBE cells transfected with control (CTL) or Rab11A+B siRNAs (n=3). Scale bar: 5  $\mu$ m. Data are means  $\pm$  SEM on each panel. n.s., non-significant, \*p<0.05, \*\*p<0.01.

**Table S1. Antibodies used in this study.** IF, Immunofluorescence; WB, immunoblotting

| Name                                         | Host   | Reference -Company      | Dilution              |
|----------------------------------------------|--------|-------------------------|-----------------------|
| Monoclonal anti-ACAP1 (B-11)                 | mouse  | sc-376574 -Santa Cruz   | 1 :100/WB             |
| Monoclonal anti-acetylated-tubulin (6-11B-1) | mouse  | T7451 -Sigma            | 1 :100/IF             |
| Monoclonal anti-beta-actin (mAbcam 8226)     | mouse  | ab8226 -AbCam           | 1 :300/WB             |
| Polyclonal anti-AP1M2                        | rabbit | bs-13638R -Bioss        | 1 :1000/WB            |
| Monoclonal anti-CFTR (L12B4)                 | mouse  | MAB3484 -Millipore      | 1 :1000/WB            |
| Monoclonal anti-CFTR (M3A7)                  | mouse  | MAB3480 -Millipore      | 1 :1000/WB            |
| Monoclonal anti-EBP50/NHERF1 (clone6)        | mouse  | 611160-BD -Trans lab    | 1 :1000/WB            |
| Monoclonal anti-EGFR (ICR10)                 | rat    | GTX20231 -GeneTex       | 1 :2000/ELISA         |
| Monoclonal anti-H+K+ ATPase (2G11)           | mouse  | ab2866 -AbCam           | 1 :200/IF             |
| Monoclonal anti-HA.11 (16B12)                | mouse  | MMS-101R -Covance       | 1 :2000/WB            |
| Monoclonal anti-Hsp70/Hsc70/Hsp73 (1B5)      | rat    | ADI-SPA-815-D -Enzo     | 1 :1000/WB            |
| Monoclonal anti-Hsp90 (K41009)               | rat    | ADI-SPA-839-050 -Enzo   | 1 :1000/WB            |
| Monoclonal anti-mucin5A/C (45M1)             | mouse  | MS-145-P0 -ThermoFisher | 1 :200/IF             |
| Monoclonal anti-Na+K+ ATPase (H-3)           | mouse  | sc-48345 -SantaCruz     | 1 :5000/WB            |
| Monoclonal anti-SNX27 (1C6)                  | mouse  | ab77799 -AbCam          | 1 :500/WB             |
| Monoclonal anti-SNX4 (B-4)                   | mouse  | sc-271147 -SantaCruz    | 1 :300/WB             |
| Monoclonal anti-syntaxin4 (49)               | mouse  | 610439 -BD Biosciences  | 1 :500/WB             |
| Polyclonal anti-EBP50/NHERF1                 | rabbit | ab3452 -AbCam           | 1 :200/IF             |
| Polyclonal anti-EEA1                         | rabbit | PA1-063A -ThermoFisher  | 1 :300/IF             |
| Monoclonal anti-EHD1                         | rabbit | EPR4954 -AbCam          | 1 :2000/WB            |
| Polyclonal anti-myosin5B                     | rabbit | PAB23710 -AbNova        | 1 :1000/WB            |
| Polyclonal anti-Rab11                        | rabbit | R5903 -Sigma            | 1 :500/IF, 1 :1000/WB |
| Polyclonal anti-Rab4 (EPR3042)               | rabbit | GTX62731 -GeneTex       | 1 :500/WB             |
| Polyclonal anti-Rab5 (S-19)                  | rabbit | sc-309 -SantaCruz       | 1 :1000/WB            |
| Polyclonal anti-Rab8A                        | rabbit | 55296-1-AP -ProteinTech | 1 :200/IF, 1:300/WB   |
| Polyclonal anti-SNX17                        | rabbit | 10275-1-AP -ProteinTech | 1 :300/WB             |
| Polyclonal anti-syntaxin 3 (H-33)            | rabbit | sc-135259 -SantaCruz    | 1 :200/WB             |
| Monoclonal anti $\alpha$ -tubulin (DM1A)     | mouse  | T9026 -Sigma            | 1 :5000/WB            |
| Polyclonal anti-ZO-1 (mid)                   | rabbit | 40-2200 -Invitrogen     | 1 :100/IF             |

**Table S2. siRNAs used in this study.** Bold siRNAs are stealth RNAi obtained from Invitrogen. All other pre-designed siRNAs were obtained from Qiagen/Origene.

| Gene     | Product name                                          |
|----------|-------------------------------------------------------|
| CTL      | <b>Control stealth Med GC</b>                         |
| NHERF1 1 | <b>HSS145123</b>                                      |
| NHERF1 2 | Hs_SLC9A3R1_5                                         |
| NHERF2   | <b>HSS113866 ; HSS113867</b>                          |
| PDZK1 1  | Hs_PDZK1_8                                            |
| PDZK1 2  | <b>HSS107800 ; HSS182218</b>                          |
| Shank2 1 | <b>HSS117944 ; HSS177049</b>                          |
| Shank2 2 | Hs_SHANK2_9 ; Hs_SHANK2_10                            |
| CAL      | <b>HSS126013</b>                                      |
| NHERF4   | <b>HSS188224</b>                                      |
| Rab3b    | Hs_RAB3B_3 ; Hs_RAB3B_4                               |
| Rab3d    | Hs_RAB3D_3 ; Hs_RAB3D_4                               |
| Rab4     | Hs_RAB4A_5 ; Hs_RAB4A_6                               |
| Rab5     | Hs_RAB5A_5 ; Hs_RAB5A_8                               |
| Rab8     | Hs_RAB8A_4 ; Hs_RAB8A_5                               |
| Rab10    | Hs_RAB10_3 ; Hs_RAB10_5                               |
| Rab11    | Hs_RAB11A_5 ; Hs_RAB11A_6 ; Hs_RAB11B_1 ; Hs_RAB11B_6 |
| Rab17    | Hs_RAB17_4 ; Hs_RAB17_5                               |
| EEA1     | Hs_EEA1_5 ; Hs_EEA1_7 ; Hs_EEA1_9                     |
| Rab25    | Hs_RAB25_1 ; Hs_RAB25_3                               |
| EHD1     | Hs_EHD1_3                                             |
| Vps35    | Hs_VPS35_5 ; Hs_VPS35_6 ; Hs_VPS35_8                  |
| ACAP1    | Hs_CENTB1_1 ; Hs_CENTB1_5                             |
| Arf6     | Hs_ARF6_5 ; Hs_ARF6_8                                 |
| GGA3     | Hs_GGA3_1 ; Hs_GGA3_9                                 |
| SNX4     | Hs_SNX4_2 ; Hs_SNX4_7                                 |
| SNX17    | Hs_SNX17_1 ; Hs_SNX17_2                               |
| SNX27    | Hs_SNX27_5 ; Hs_SNX27_6                               |
| STX3     | SR321926-A                                            |
| STX4     | Hs_STX4A_2 ; Hs_STX4_1                                |
| Vamp8    | <b>HSS189495</b>                                      |
| Exo70    | Hs_EXOC7_5 ; Hs_EXOC7_6                               |
| Gal3     | Hs_LGALS3_7 ; Hs_LGALS3_3 ; Hs_LGALS3_8               |
| AP1A     | Hs_AP1M1_1 ; Hs_AP1M1_6                               |
| AP1B 1   | Hs_AP1M2_5 ; Hs_AP1M2_6 ; Hs_AP1M2_8                  |
| AP1B 2   | Hs_AP1M2_7 ; Hs_AP1M2_9 ; Hs_AP1M2_10                 |
| Myo5B 1  | <b>HSS181415</b>                                      |
| Myo5B 2  | Hs_MYO5B_7 ; Hs_MYO5B_10                              |

**Table S3. qPCR primers used in this study**

| Gene symbol   | Direction | Sequence                |
|---------------|-----------|-------------------------|
| CFTR          | forward   | AGTGGAGGAAAGCCTTTGGAGT  |
|               | reverse   | ACAGATCTGAGCCCAACCTCA   |
| GAPDH         | forward   | CATGAGAAGTATGACAACAGCCT |
|               | reverse   | AGTCCTTCCACGATACCAAAGT  |
| ACAP1         | forward   | CTGAGATGACGGTCAAGCTG    |
|               | reverse   | AGACCAGTGCCCAGTTTCAG    |
| AP1A (AP1M1)  | forward   | GAGGTGTTCTTGGACGTCATC   |
|               | reverse   | CATGCCCGAGAGGAAGACT     |
| AP1B (AP1M2)  | forward   | GGCCAGGTCCACTTCCTATG    |
|               | reverse   | GCAACTCGTAGACGATGACAAA  |
| ARF6          | forward   | AGGAACTGGTATGTGCAGCC    |
|               | reverse   | GATTTCTCTCCTTCCAGGGG    |
| EEA1          | forward   | ACCCCGAGTAGTGAGTGGC     |
|               | reverse   | CTTGAGAGCCAACCTCTCCA    |
| EXO70 (EXOC7) | forward   | TTCCTCTGGGGTTCCTACT     |
|               | reverse   | ACGCAGTGGATGTAGGCAT     |
| GAL3 (LGALS3) | forward   | CTGGGGAAGGGAAGAAAGAC    |
|               | reverse   | CCCGATGATTGTACTGCAAC    |
| GGA3          | forward   | AAGGGGAAGCCTGGAGTC      |
|               | reverse   | CCTTCCAGCTCCTTGTTGAT    |
| RAB3B         | forward   | GTGGGCATCGACTTCAAGGT    |
|               | reverse   | CCCACGGTAATAGGCTGTTG    |
| RAB3D         | forward   | GTGGGGAACAAGTGTGACCT    |
|               | reverse   | CATTGATGTTCTCCTTGGCA    |
| RAB10         | forward   | CCTTTTTCGTTTTTCGGATG    |
|               | reverse   | GGCCTGCTGTATCCCATATC    |
| RAB17         | forward   | AGCTGGTTCTCCTGGGAAGT    |
|               | reverse   | ACCACCTTTGTGAAGAACGC    |
| RAB25         | forward   | CAAGATGGGGAATGGAAGTG    |
|               | reverse   | CTGTCGTGGCTGAACTCATT    |
| STX3          | forward   | TCGGCAGACCTTCGGATTC     |
|               | reverse   | TCCTCATCGGTTGTCTTTTTGC  |
| VAMP8         | forward   | TTATGACCCAGAATGTGGAGC   |
|               | reverse   | CCTTCTGCGATGTCGTCTTGA   |
| VPS35         | forward   | TTTTGGAGCTGGTGGAAATC    |
|               | reverse   | TCTGGCATTTCCTTTCCCAT    |
| CAL           | forward   | AGAAGATGACCAGCCTGAGC    |
|               | reverse   | CTCTGCTTGGGTTTCTGTCA    |
| NHERF1/EBP50  | forward   | GGGGCTGGCAACGAAAATG     |
|               | reverse   | GACCGGATGAACTGGCCTG     |
| NHERF2/E3KARP | forward   | CTGGTTCCGACAAGGACACTG   |
|               | reverse   | CAGGAAGGGGCTCAGAAGTT    |
| NHERF3/PDZK1  | forward   | GTGTAGCCCAGCAGAGAAG     |
|               | reverse   | ACCAGATCCACAACCTGCAT    |
| SHANK2        | forward   | GACTAAGGACCGGGGACTTC    |
|               | reverse   | TGACCACCTTAAGGACCAGG    |
